1 **Phylogeny of docks and sorrels (*Rumex*, Polygonaceae) reveals plasticity of reproductive**  
2 **systems**

3

4 Kirstie D. Grant<sup>1</sup>, Daniel Koenemann<sup>2</sup>, Janet Mansaray<sup>3</sup>, Aisha Ahmed<sup>4</sup>, Hamid Khamar<sup>5,6</sup>, Jalal  
5 El Oualidi<sup>5</sup> and Janelle M. Burke<sup>2,\*</sup>

6

7 1. Department of Biology, West Chester University of Pennsylvania, West Chester, PA, USA

8 2. Department of Biology, Howard University, Washington, DC, USA

9 3. Department of Biological Sciences, Louisiana State University, Baton Rouge, LA, USA

10 4. College of Medicine, Howard University, Washington, DC, USA

11 5. Département de Botanique et Ecologie Végétale, Institut Scientifique, Université Mohammed

12 V de Rabat, Rabat, Morocco.

13 6. Université Ibn Tofail, Faculté des Sciences, Laboratoire de Botanique et de Protection des  
14 plantes, B.P. 133, Kénitra, Morocco.

15

16 \*Author for correspondence. Email: [Janelle.burke@howard.edu](mailto:Janelle.burke@howard.edu), Telephone: 1-202-806-4172.

17

18

19

20

21

22

23

24 **Abstract**

25 The genus *Rumex* is a unique member of the Polygonaceae (Buckwheat) family of plants. A  
26 source of intrigue for *Rumex* lies in the diversity of the reproductive systems associated with the  
27 subgenera, species, and subspecies within this genus. Four previously circumscribed subgenera,  
28 some 200 species, and a number of subspecies comprise the collective *Rumex* genus. These  
29 species exhibit monoecious, dioecious, synoecious (hermaphroditic), and polygamous  
30 reproductive systems. Moreover, some of the dioecious species contain sex chromosomes, a  
31 phenomenon that is very rare in angiosperms. Apart from the confirmed morphological and  
32 phytogeographical distinctions, two of the four described subgenera, *Acetosa* and *Acetosella*, are  
33 distinctive in their exhibited sex chromosome systems. For this study, we used three chloroplast  
34 markers, *rbcL*, *trnH-psbA*, *trnL-F*, and dense taxon sampling, to reconstruct a molecular  
35 phylogeny for *Rumex*. The reconstructed phylogeny for this work resolves six major clades and  
36 one large grade in *Rumex*. In addition, the species with known dioecious reproductive systems  
37 derived from unique sex chromosome systems are resolved in two different clades nested within  
38 “the dioecious clade”. These results suggest that the species with divergent sexual systems are  
39 more closely related to each other than to other species comprising the rest of the *Rumex* genus.  
40 Furthermore, some species with known synoecious reproductive systems are resolved in a single  
41 clade which is also nested within “the dioecious clade”. These results imply a possible reversal  
42 occurring over time which suggests the highly plastic nature of reproductive systems among  
43 *Rumex* species.

44

45

46

47 **Introduction**

48 Commonly known as docks and sorrels, *Rumex* L. (Polygonaceae) is a relatively large  
49 genus. *Rumex* encompasses four circumscribed subgenera, approximately 200 species, and  
50 hundreds of described subspecies or varieties. Many species in *Rumex* are cosmopolitan in  
51 nature, spanning six continents of the world. However, many individual species are either  
52 regionally endemic, native, or introduced on particular continents (Rechinger, 1937). The  
53 cosmopolitan attributes of *Rumex* species are indicative of their ability to thrive in a wide variety  
54 of environmental conditions. In addition to being distributed globally, plants of the genus inhabit  
55 a wide range of habitats and ecotypes.

56 *Rumex* species are among the most ubiquitous plants in the world. Described species are  
57 just as recurrent in dry and sandy soils as they are in marshes and cultivated fields spanning the  
58 arctic, subarctic, boreal, temperate, tropical, and subtropical localities (Löve & Kapoor, 1967).  
59 Although several biological species demonstrate little to no niche preference (*e.g.*, *Rumex*  
60 *crispus*, *Rumex obtusifolius*), there are others that exhibit exceedingly precise ecological  
61 requirements (*e.g.*, *Rumex bipinnatus*, *Rumex pictus*). The large variation in the distribution of  
62 *Rumex* species might also account for the large deviation observed in the morphology of these  
63 species, whereby some reach almost seven meters in height, and others rarely exceed a few  
64 centimeters (Rechinger, 1949; Löve & Kapoor, 1967; Rechinger, 1990).

65 The broad variation in both the morphology and phytogeography of *Rumex* species is also  
66 indicative of the substantial taxonomic classification interest in these species. Documented  
67 descriptions of plants in the genus date back to the time of classical Greece. Species of *Rumex*  
68 are first noted by Hippocrates (greek physician) and Theophrastus (Greek philosopher) under the  
69 name *Lapathum* (Campderá, 1819). The first formal monograph of *Rumex* species was

70 completed in 1819 (Campderá, 1819), documenting 110 species of *Rumex* proper and delineating  
71 three genera of "Rumices" in the broad sense: *Emex* (L.) Campd., *Rumex*, and *Oxyria* Auth.

72 Its second formal monograph was completed in 1856 (Meisner, 1856), documenting 134  
73 species of *Rumex*, dividing it into three sections: *Acetosa* ('sorrels'), *Acetosella* ('sorrels'), and  
74 *Lapathum* ('docks') (Meisner, 1856; Löve, 1967). In the 20<sup>th</sup> Century, progress in the taxonomic  
75 and cytological study of *Rumex* was largely accomplished by two researchers: Áskell Löve and  
76 Karl Heinz Rechinger (Rechinger, 1937; Rechinger, 1954; Löve, 1967). Löve extensively  
77 documented the cytological diversity of *Rumex*, and he proposed a generic status for *Acetosa* and  
78 *Acetosella* (the groups with species bearing heteromorphic sex chromosomes) and subgeneric  
79 status for *Axillares* and *Platypodium*. Löve also considered *Rumex* to be composed of several  
80 smaller genera corresponding to a number of cytotypes (Löve 1957; Löve & Kapoor 1967;  
81 Mariotti *et al.*, 2006, 2009).

82 Over the course of his long career, Rechinger effectively monographed *Rumex*, using  
83 plant morphology and geographic distribution (Rechinger 1933, 1937, 1939, 1949, 1954a,  
84 1954b, 1984, 1990; Brandbyge & Rechinger, 1989). It was not until the mid-1900's that  
85 Rechinger proposed a subgeneric status for *Platypodium* and maintained *Acetosa*, *Acetosella*,  
86 and *Lapathum* as comparable subgenera (Rechinger, 1954). In important respects, Rechinger's  
87 morphological classification mirrored Löve's cytological classification. Löve's cytotypes were  
88 largely reflected in Rechinger's subgeneric sectional system. Rechinger, however, chose to retain  
89 *Rumex* as a single genus.

90 Recent molecular phylogenetic work has sought to resolve the placement of *Rumex* in the  
91 Polygonaceae more broadly (Sanchez & Kron, 2008, Sanchez *et al.*, 2009; Burke *et al.*, 2010;  
92 Burke & Sanchez, 2011; Sanchez *et al.*, 2011; Schuster *et al.*, 2011; Schuster *et al.*, 2013;

93 Schuster *et al.*, 2015). These studies have placed *Rumex* alongside the other Rumices of  
94 Campderá (*Emex* and *Oxyria*), with the addition of *Rheum* as either sister to *Oxyria* (Burke *et al.*,  
95 2010; Schuster *et al.*, 2011) or to *Rumex* + *Emex* (Schuster *et al.*, 2013; Schuster *et al.*, 2015).  
96 One area that lacks clarity has been the placement of *Emex*, which sometimes appears to be  
97 nested within *Rumex* (*e.g.*, Sanchez *et al.*, 2011) and is sometimes placed as sister to *Rumex* (*e.g.*  
98 Burke *et al.*, 2010). The relationships of species within *Rumex*, including the relationship  
99 between *Rumex* and *Emex*, continue to be poorly understood due to insufficient sampling and  
100 paucity of data. To date, the relationships among species placed within Rechinger's subgenus  
101 *Rumex* are particularly obscure.

102         The reproductive systems of *Rumex* species vary just as much, or more, than their studied  
103 morphologies and geographical distributions. The high degrees of variation in the reproductive  
104 systems of *Rumex* species can also speak to the macroevolutionary significance of circumscribed  
105 *Rumex* subgenera, another attribute that accounts for much of the longstanding interest in this  
106 genus. Species of *Rumex* demonstrate synoecious (hermaphroditic), monoecious, dioecious, and  
107 polygamous reproductive systems (Rechinger 1949; Rechinger 1954a; Löve & Kapoor, 1967;  
108 Mosyakin, 2005; Navajas-Pérez *et al.*, 2005). Most of the reproductive system diversity has been  
109 described in subgenera *Acetosa* or *Acetosella*. In particular, most species in those subgenera are  
110 dioecious (Rechinger 1937, 1949, 1954a, 1984). A few species in subgenus *Rumex* have variable  
111 systems, especially between synoecy and monoecy (*e.g.*, *Rumex crispus*, pers. obs.). Also  
112 noteworthy are the three species of *Rumex* endemic to the Hawaiian islands (*Rumex albescens*, *R.*  
113 *giganteus* and *R. skottsbergii*), which are all monoecious (Wagner *et al.*, 1999).

114         Heteromorphic sex chromosomes are extraordinarily uncommon in plants, occurring in  
115 <1% of all land plants (Ming *et al.*, 2011). Chromosomal sex determination systems are

116 restricted to the angiosperms, bryophytes, and gymnosperms, but have evolved repeatedly and  
117 independently within these groups (Charlesworth, 2002; Ming *et al.*, 2011; Renner, 2014). In  
118 plants with sex chromosomes, a variety of sex determining mechanisms are present (Ming *et al.*,  
119 2011). In *Rumex*, the documented sex chromosomes are heteromorphic. Two sex determining  
120 chromosomal mechanisms are known: XX/XY and XX/XY<sub>1</sub>Y<sub>2</sub> (Löve, 1940; Löve, 1942; Löve,  
121 1943; Löve, 1944; Löve & Löve, 1948; Shibata *et al.*, 1999; Shibata *et al.*, 2000; Navajas-Pérez  
122 *et al.*, 2005; Cunado *et al.*, 2007; Ming *et al.* 2011). The XX/XY (male heterogamy) system bears  
123 more than a passing resemblance to the mammalian sex determination system, and studies of the  
124 formation of this chromosomal arrangement in plants may give insights into the historical  
125 formation of the analogous system in mammals (Charlesworth, 2002). The XX/XY<sub>1</sub>Y<sub>2</sub> system is  
126 dosage-dependent, and plant sex is based on the autosome to sex-chromosome ratio. In this  
127 system, female individuals have 14 chromosomes, and male individuals have 15 chromosomes  
128 (Löve, 1940; Löve, 1944; Löve, & Kapoor, 1967; Navajas-Pérez *et al.*, 2005).

129         The vast majority of plants are synoecious with at least morphologically hermaphroditic  
130 flowers (Ming *et al.*, 2011) and this has been considered the ancestral state for land plants  
131 (Navajas-Pérez *et al.*, 2005; Ming *et al.*, 2011, but see also Renner, 2014). Holding true to the  
132 same synoecious ancestral state, the vast majority of *Rumex* species, particularly those nested  
133 within subgenus *Rumex*, reveal predominantly synoecious reproductive systems (Rechinger,  
134 1937; Rechinger, 1954; Świetlińska, 1963). Dioecious plants have been proposed to be derived  
135 from synoecious ancestors via two possible pathways, with either gynodioecy as a transitional  
136 state or monoecy as a transitional state (Figure 1; Charlesworth & Charlesworth, 1978;  
137 Lewis, 1942; Lloyd, 1980; Lloyd & Webb, 1986; Renner & Won, 2001; Barrett, 2013; Crossman  
138 & Charlesworth, 2013).

139 Both monoecy and dioecy have evolved multiple times in plants (Charlesworth 2002,  
140 Renner & Won 2001; Ming *et al.*, 2011). Historically, it had been suggested that dioecy emerged  
141 multiple times in *Rumex* (Fox, 1985). Navajas-Pérez *et al.* (2005), however, concluded that  
142 heteromorphic sex chromosomes evolved only once in *Rumex*, while dioecy (without  
143 heteromorphic sex chromosomes) evolved twice. For some time, dioecy appeared to be  
144 evolutionarily terminal since many dioecious taxa are embedded in clades of hermaphroditic taxa  
145 and purely dioecious clades are usually species-poor (Heilbuth, 2000; Barrett, 2013).

146 More recently, however, several cases of reversals from dioecy to monoecy have been  
147 recorded (Barrett, 2013). In all of these cases, monoecy was derived from a group of “leaky”  
148 dioecious plants. At the population level of these supposedly dioecious taxa, some  
149 hermaphroditic and monoecious individuals are always present (Świetlińska, 1963; Lloyd 1980,  
150 Charlesworth, 2002; Barrett, 2013; Crossman & Charlesworth, 2013). The exact conditions  
151 under which dioecy, especially dioecy controlled by sex chromosomes, transitions back to  
152 monoecy or synoecy are unknown and only a few cases have been well studied (Heilbuth, 2000;  
153 Schaefer & Renner, 2011; Crossman & Charlesworth, 2013).

154 The purpose of this study was to provide a molecular phylogeny of *Rumex*, test the  
155 placement and monophyly of its circumscribed subgenera, and to elucidate the evolution of  
156 reproductive systems in *Rumex*. We here present a new phylogeny of *Rumex* constructed using  
157 three plastid gene regions (*trnH-psbA*, *rbcL*, and *trnL-F*) and 67 *Rumex* species. One objective is  
158 to discover whether Rechinger's subgeneric delineations based on morphology and  
159 phytogeography are supported by our phylogeny based on molecular data. In addition, we  
160 address whether large scale patterns can be discerned in the reproductive systems exhibited by  
161 *Rumex*.

162

163 **Materials and Methods**

164 *Taxon Sampling and DNA Isolation*

165 DNA was isolated from 109 accessions, representing 67 *Rumex* species. Of the 109 included  
166 accessions, a total of 99 *Rumex* accessions, 6 *Rheum* species, 3 *Emex* accessions, and 1 species of  
167 *Persicaria* are represented. *Persicaria virginiana*, *Rheum alexandrae*, *Rheum emodii*, *Rheum*  
168 *nobile*, *Rheum officinarum*, *Rheum palmatum*, and *Rheum rhabarbarum*, were included as  
169 outgroup species. Additional plant samples were obtained through the GenBank sequence  
170 database (Appendix 1). Samples were taken from a combination of herbarium specimens (K,  
171 NY, OSC, RAB, US), field collections, and cultivated samples from collaborators. Herbarium  
172 acronyms follow the Index Herbariorum (Thiers, 2019).

173 All fresh leaf samples were dried using silica gel. Plant tissue was homogenized using the  
174 FastPrep-24<sup>TM</sup> 5G Sample Preparation System (M. P. Biomedicals, LLC Santa Ana CA, USA).  
175 Total genomic DNA was extracted from herbarium specimen-sampled and silica-dried leaf  
176 tissues using a BIOLINE ISOLATE II Plant DNA Kit (Cat No. BIO-52070). Modification for  
177 herbarium material proceeded as follows: Cell lysis was carried out using 300 $\mu$ L of buffer (PA1  
178 or PA2) and 30 $\mu$ L of proteinase K (20 $\mu$ g/mL) and incubated for 18 hours at 65 $^{\circ}$  on an orbital  
179 shaker).

180 *Marker Selection*

181 For this first comprehensive phylogeny for the genus, we focused on plastid marker selection.  
182 Previous authors of recently reconstructed Polygonaceae phylogenies have used nrITS as a  
183 nuclear marker (Schuster *et al.*, 2011; Schuster *et al.*, 2015). However, we avoided nrITS for this  
184 phylogeny due to a number of issues that would interfere with accurate reconstruction of



185 evolutionary relationships: 1) nrITS is extremely variable and difficult to align (66% of nrITS  
186 sequence data was excluded in Schuster *et al.* (2015) publication, and 2) Due to widespread  
187 polyploidy documented in multiple *Rumex* species, sequences of nrITS would not necessarily be  
188 low copy, and there would be substantial issues with paralogy and orthology across multiple  
189 polyploidy events.

190 For plastid marker selection, we screened multiple markers that had previously been used  
191 in Polygonaceae reconstruction (Burke *et al.*, 2010; Burke and Sanchez, 2011; Koenemann and  
192 Burke, 2020). We selected markers that both showed sufficient variation across the genus, and  
193 were easily amplified for most taxa.

194

#### 195 *PCR Amplification and Sequencing*

196 Amplification of DNA markers was completed for three plastid regions: *rbcL*, *trnH-psbA* and  
197 *trnL-F*. The first amplified region was the plastid large subunit of ribulose-bisphosphate  
198 carboxylase (*rbcL*) using the primers *rbcLaF* (5'-ATG TCA CCA CAA ACA GAG ACT AAA  
199 GC-3') and *rbcLaR* (5'-GTA AAA TCA AGT CCA CCR CG-3') (Table 1). PCR conditions  
200 were as follows: 94°C for 1 min, followed by 34 cycles of 94°C/15 s, 54°C/15 s, and 72°C/30 s, and  
201 a final extension period of 5 min at 72°C. The second region was analyzed using primers *trnH*  
202 (5'-ACT GCC TTG ATC CAC TTG GC-3') and *psbA* (5'-CGA AGC TCC ATC TAC AAA  
203 TGG-3') as an intergenic spacer. PCR conditions were as follows: 94°C for 2 min, followed by  
204 34 cycles of 94°C/30 s, 55°C/30 s, and 72°C/30 s, and a final extension period of 7 min at 72°C.  
205 Compared to the *rbcL* gene and the *trnH-psbA* intergenic spacer, a second, much shorter  
206 intergenic spacer was examined. This intergenic spacer was amplified using primers 3'*trnL*<sup>UAA</sup>*F*  
207 (5'-GGT TCA AGT CCC TCT ATC CC-3') exon and the *trnF*<sup>GAA</sup> (5'-ATT TGA ACT GGT

208 GAC ACG AG-3') gene which were used as primers. PCR conditions were as follows: 80□ for 5  
209 min, followed by 34 cycles of 94□/1 min, 55□/1 min, and 72□/2 min, and a final extension  
210 period of 5 min at 72□. PCR was performed to amplify all target gene regions using a BIOLINE  
211 MyTaq<sup>TM</sup> Red Mix, 2X (Cat. No. BIO-25044) with no special PCR conditions. PCR samples  
212 were then visualized on 1% agarose gels and run at 100V for 15 - 30 min against the BIOLINE  
213 100bp – 2000bp EasyLadder I (Cat. No. BIO-33045) to observe the bands of specified gene  
214 regions. PCR experiments were segregated to contain amplification of only fresh or only  
215 herbarium material to help prevent cross-contamination.

216 PCR amplicons were sent to Eurofins Genomics (Louisville, KY) for Sanger sequencing.  
217 Sequences were edited using Geneious v. 10 (Biomatters Ltd.). Reviewed sequences were  
218 aligned with MUSCLE (Edgar, 2004), and concatenated using MESQUITE (Maddison, 2005).

219

### 220 *Phylogeny Reconstruction*

221 The final dataset contained 92 *rbcL*, 93 *trnL-F*, and 95 *trnH-psbA* accessions (Grant, 2020). All  
222 phylogenetic analyses were completed using the CIPRES Science Gateway V 3.3 (Miller *et al.*,  
223 2010). Prior to the phylogenetic reconstructions, we performed ModelTest-NG (Darriba *et al.*,  
224 2019) for the concatenated matrix to determine the suggested model of evolution. ModelTest-NG  
225 indicated that the best fit was the General time reversible (GTR) model.

226 We performed Maximum likelihood (ML) phylogeny reconstruction using GARLI v.  
227 2.01.1067 (Zwickl, 2006). We used the default GARLI parameters with the following  
228 exceptions. We performed 1000 search replications (10 iterations of 100 search replicates). In  
229 order to better search tree space, we increased the attachments per taxon setting to 150 and  
230 extended the generations without improvement parameter to 50000. To evaluate support for

231 phylogenetic relationships, statistical bootstrapping was performed, specifying only one search  
232 replicate per bootstrap iteration for 100 iterations. All bootstrap trees were downloaded and used  
233 to generate a majority rule consensus tree in MESQUITE (Maddison, 2005). The consensus tree  
234 was visualized in FigTree version 1.4.3 (Rambaut, 2014).

235 We performed Bayesian Inference phylogeny reconstruction in MrBayes 3.2.7a  
236 (Ronquist *et al.*, 2012). The priors were set to the defaults (Dirichlet). We set the seed number at  
237 123. We conducted two independent Markov Chain Monte Carlo (MCMC) runs, each with four  
238 chains employing BEAGLE library acceleration (as recommended by CIPRES). Each MCMC  
239 run was set to complete 5 million generations, with trees sampled every 1,000 generations. The  
240 first 25% of trees in each run were discarded as burn-in. MrBayes then synthesized the two  
241 independent runs and we extracted the majority rule consensus tree with posterior probabilities.

242 Posterior probability and bootstrap values were visualized using FigTree version 1.4.3  
243 (Rambaut, 2014) and MESQUITE (Maddison, 2005). Posterior probabilities above 90% and  
244 bootstrap support values above 70% were considered significant and annotated in the final  
245 phylogeny.

246

## 247 **Results**

248 The recovered most likely tree was generated using 109 specimen accessions. This included 7  
249 outgroup species, 3 accessions of *Emex*, and 99 accessions of *Rumex*. The present phylogeny  
250 represents 67 *Rumex* species, more than twice the number of species of *Rumex* sampled in  
251 previous phylogenies (31 species in Navajas-Pérez *et al.*, 2005; 13 species in Schuster *et al.*,  
252 2015). A total of 47 sequences were missing from the final matrix, yielding 14.4% missing data  
253 in the final analysis (Grant, 2020). Table 1 summarizes the variability of each of the gene

254 regions. The most variable region was *trnH-psbA*, which consisted of 22.1% parsimony  
255 informative characters. The least variable region was *rbcL* which consisted of 4.5% parsimony  
256 informative characters. The most likely tree recovered by GARLI received a likelihood score of  
257  $Ln = -5767.548440$ .

258         The genus *Rumex* was recovered as monophyletic with strong support (100 Bayesian  
259 Posterior Probability/98 Maximum Likelihood Bootstrap) (Figure 2). The analysis did not  
260 recover *Rumex* subgenus *Rumex*, the subgenus with the most species diversity, as monophyletic.  
261 In our phylogeny, species of subgenus *Rumex* form a grade at the base of the tree (“Basal Grade”  
262 - Figure 2). Above the *Rumex* grade, *Emex* (Clade 1), was recovered as monophyletic and sister  
263 to “the dioecious clade” (Figure 2). While the results indicate strong support for the relationship  
264 between the known *Emex* species, *E. australis* and *E. spinosa* (100/98), they are conflicting and  
265 show poor support for the placement of *Emex* within *Rumex*. Posterior probability support for the  
266 placement of *Emex* as sister to the Dioecious Clade is only 52% and the most likely GARLI tree  
267 placed *Emex* within the Basal Grade of subgenus *Rumex*. Furthermore, different gene regions  
268 reconstructed conflicting topologies for the placement of *Emex*. The *rbcL* phylogeny placed  
269 *Emex* within *Rumex* subgenus *Rumex* (50% bootstrap support). Both *trnh-psbA* and *trnL-F*  
270 placed *Emex* as sister to the *Rumex* genus (*trnh-psbA* <50% bootstrap support, and *trnL-F* 91%  
271 bootstrap support) (results not shown).

272         The remaining taxa, comprising the subgenera *Acetosa*, *Acetosella*, and *Platypodium*  
273 form a highly supported (99/80) monophyletic group (Figure 2). This group is denoted as “the  
274 dioecious clade” because the known dioecious *Rumex* species were resolved in this group. The  
275 relationships of the clades within this group are also well-supported. Our recovered phylogenetic  
276 tree did not recover subgenus *Acetosa* as monophyletic. Within the dioecious clade, subgenus

277 *Acetosa* is comprised of three well-supported, monophyletic groups, Clade 2 (100/97), Clade 3  
278 (100/78), and Clade 4 (100/97), and is nested below a pair of clades, represented by subgenus  
279 *Platypodium* (Clade 5) and subgenus *Acetosella* (Clade 6). The pair is also well supported  
280 (100/81). Subgenus *Platypodium* was recovered as monophyletic with strong support (100/100),  
281 and consists of four accessions of its only circumscribed species: *Rumex bucephalophorus*.  
282 Species in subgenus *Acetosella* were recovered together with strong support (100/89), but the  
283 inclusion of *Rumex hastatulus* means the subgenus was not recovered as monophyletic (Figure  
284 2).

285 Beginning at its basal lineages, the recovered topology largely corresponds to the  
286 diversity of the reproductive and sex chromosome systems present in *Rumex*. Species in  
287 subgenus *Rumex* are hermaphroditic with no documented heteromorphic sex chromosomes.  
288 These species, while not recovered as a clade, are recovered together in the basal grade. Also  
289 with no documented heteromorphic sex chromosomes, *Emex* is represented as a clade that  
290 consists of purely monoecious species. Within “the dioecious clade”, subgenus *Acetosa* consists  
291 entirely of dioecious species, with some members exhibiting the sex chromosome system  
292 XX/XY<sub>1</sub>Y<sub>2</sub> represented in Clade 4 (Dioecious Species, Complex Sex Chromosome System)  
293 (Figure 2). Subgenus *Platypodium*, another hermaphroditic group with no reported sex  
294 chromosomes is nested between subgenera *Acetosa* and *Acetosella*. Subgenus *Acetosella* (Clade  
295 6) consists of species that are both dioecious and have the sex chromosome system XX/XY  
296 (Figure 2).

297

298 **Discussion**

299 Our results produced a phylogeny of *Rumex*, with six clades and one grade, largely  
300 congruent with Rechinger's subgeneric classification and the evolution of reproductive and sex  
301 chromosome systems present in *Rumex*. Moreover, the species with divergent sex chromosome  
302 systems in *Rumex* are resolved as two separate clades, with the simple sex chromosome system,  
303 XX/XY, being more derived. Where the basal grade contains most of the synoecious species, the  
304 larger clade in the phylogeny, designated "the dioecious clade", represents most of the diversity  
305 and variation across reproductive systems in the genus.

306 Within the phylogeny: the basal grade is mostly made up of synoecious species from  
307 *Rumex* subgenus *Rumex*. In this portion of the study, we observed a peculiar finding where  
308 subgenus *Rumex* was recovered as a grade instead of the anticipated clade. Given this finding,  
309 we suspect that potentially, with even more taxon sampling, subgenus *Rumex* would have been  
310 recovered as a monophyletic clade. Although dioecious, the species included in Clade 2 and  
311 Clade 3 have no reported sex chromosome systems. The species included in Clade 4 exhibit a  
312 complex sex chromosome system (XX/XY<sub>1</sub>Y<sub>2</sub>). This placement suggests that this heteromorphic  
313 sex chromosome system was derived from dioecious ancestors. The genetic origin of  
314 heteromorphic sex chromosomes in *Rumex* is beyond the scope of this manuscript, but we provide a  
315 framework to investigate potentially intermediary taxa that may contain homomorphic or  
316 transitional sex chromosome systems.

317 Subgenus *Platypodium* (Clade 5) was resolved as monophyletic and nested within "the  
318 dioecious clade". Based on its plant and chromosome morphology, earlier studies concerning  
319 *Rumex bucephalophorus* have referred to it as the link between subgenus *Rumex*, which is  
320 predominantly synoecious, and subgenus *Acetosella*, which is predominantly dioecious (Löve,  
321 1944). Although morphologically variable, *R. bucephalophorus* consistently exhibits a

322 synoecious reproductive system. Its derivation from among the dioecious species in this  
323 phylogeny suggests a reversal from a dioecious condition.

324         The appearance of *R. bucephalophorus* within “the dioecious clade” can also speak to (1)  
325 the high degree of reproductive system plasticity and (2) the possibility of a reversal from dioecy  
326 to hermaphroditism. This is significant, because it goes against the evolutionary theory which  
327 suggests that dioecy may be an evolutionary ‘dead-end’ (Heilbuth, 2000). Reversals from dioecy  
328 back to hermaphroditism that typically occur at or near the onset of sex chromosome fluctuations  
329 have been documented in some plants (Ming, 2011; Bachtrog *et al.*, 2014). This finding is one  
330 that would support the placement of *R. bucephalophorus* as it is in the current phylogeny,  
331 between subgenera *Acetosa* (XX/X<sub>1</sub>Y<sub>2</sub>) and *Acetosella* (XX/X<sub>1</sub>Y).

332         Subgenus *Acetosella* (Clade 6), was not recovered as monophyletic. Known dioecious  
333 species, *R. hastatulus*, of subgenus *Acetosa* is nested within subgenus *Acetosella*. *Rumex*  
334 *hastatulus* is documented to exhibit two chromosomal races: a complex sex chromosome system  
335 (XX/X<sub>1</sub>Y<sub>2</sub>, North Carolina Race) which is characteristic of subgenus *Acetosa* and the simple  
336 sex chromosome system (XX/X<sub>1</sub>Y, Texas Race) which is characteristic of subgenus *Acetosella*  
337 (Navajas-Pérez *et al.*, 2005; Mariotti *et al.*, 2009; Hough *et al.*, 2014). In addition, Rechinger’s  
338 1937 treatment indicates a polygamous reproductive system for *R. hastatulus* (Rechinger, 1937).  
339 Given the variability found within this species, *R. hastatulus* could have theoretically evolved in  
340 either subgenus (*Acetosa* or *Acetosella*), where species appear to have diversified according to  
341 the type of sex chromosome system they exhibit. Again, this speaks to the plasticity of  
342 reproductive and sex chromosome systems within *Rumex*, as a single species can exhibit two  
343 different chromosomal ‘races’.

344 In all, this work has provided a reconstructed phylogeny that differs from those currently  
345 published (Navajas-Pérez *et al.*, 2012; Schuster *et al.*, 2015) and tests the placement and  
346 monophyly of its circumscribed subgenera. Additionally, this work has begun to elucidate the  
347 evolution of reproductive systems in *Rumex* by way of its proposed schematic for the pathway  
348 from synoecy (hermaphroditism) to dioecy. Simultaneously, the reconstructed phylogeny  
349 emphasizes the high degree of reproductive system plasticity of *Rumex* species. Where lacking,  
350 we have increased taxon density which has given rise to a more comprehensive evolutionary  
351 history of *Rumex* where the taxa are concerned. Future directions in *Rumex* research include the  
352 identification and application of nuclear markers that will allow for a more robust phylogeny to  
353 increase the strength of support for molecular inferences.

354

### 355 **Acknowledgements**

356 This study was largely funded by award NSF-HRD #1601031 to JMB. The authors would like to  
357 thank staff at the following herbaria for facilitating access to specimens for sampling: K, NY,  
358 OSC, RAB, and US. Special thanks to Spencer Barrett and Joanna Rifkin for access to cultivated  
359 *Rumex* material. We also thank Daniel Atha for providing us with a record of his *Rumex*  
360 collections, and facilitating access to silica-dried material. Special thanks to Mr. Ibrahim El Hafid  
361 for his assistance with transportation during the Morocco expedition. We also thank Ms. Maria  
362 Ramos for her assistance with plant cultivation at the Howard University greenhouse.

363



364 **List of Tables**

365 **Table 1**

366 Gene regions used: name of primers, total length of region, % parsimony informative characters

---

| Gene Region      | Reference                   | Primer Names                                 | Total Aligned Length | PIC (%)    |
|------------------|-----------------------------|----------------------------------------------|----------------------|------------|
| <i>rbcL</i>      | Fazekas <i>et al</i> , 2008 | rbcLF, rbcLR                                 | 539                  | 24 (4.5)   |
| <i>trnH-psbA</i> | Shaw, 2007                  | psbA, trnH                                   | 596                  | 132 (22.1) |
| <i>3trnL-F</i>   | Shaw, 2005                  | 3'trnL <sup>UAA</sup> F, trnF <sup>GAA</sup> | 442                  | 65 (14.7)  |
| Combined         |                             |                                              | 1577                 | 221 (14.0) |

---

367

368

369

370

371

372

373

374 **List of Figures**

375 **Figure 1.**

376 Hypothesis I proposed gynodioecy as the most likely intermediary state in the pathway to dioecy  
377 (Charlesworth & Charlesworth, 1978).

378 Hypothesis II proposed monoecy as the most likely intermediary state in the pathway to dioecy  
379 (Lewis, 1942).

380

381 **Figure 2.** Bayesian phylogenetic reconstruction for *Rumex* species using three chloroplast  
382 sequences (*rbcL*, *trnH-psbA*, and *trnL-F*). Thickened branch indicates simultaneous posterior  
383 probability above 90% and bootstrap support above 70%. Exact support values are indicated at  
384 important nodes (Bayesian Posterior Probability / Maximum Likelihood Bootstrap). Outgroup  
385 species (*Rheum* and *Persicaria*) are shown in blue. *Rumex* species traditionally placed in  
386 subgenus *Rumex* are shown in red. Species traditionally placed in the sister genus *Emex* are  
387 shown in green. *Rumex* species traditionally placed in subgenus *Acetosa* are shown in gold.  
388 *Rumex* species traditionally placed in subgenus *Platypodium* are shown in pink. *Rumex* species  
389 traditionally placed in subgenus *Acetosella* are shown in purple. The arrow denotes the  
390 “Dioecious Clade” referenced in the text. Parenthetical abbreviations following the taxa  
391 represent collection localities: NA = North America, ASIA = Asia, AFR = Africa, EU = Europe,  
392 PAC = Pacific, SA = South America, AU = Australia. Accessions that lack locality information  
393 were composed of GenBank sequences, where collection locality could not be determined.

394

395 **References Cited**

- 396 Bachtrog D, JE Mank, CL Peichel, M Kirkpatrick, SP Otto, TL Ashman, MW Hahn, J Kitano, I  
397 Mayrose, R Ming, N Perrin, L Ross, N Valenzuela, JC Vamosi. 2014. Sex determination:  
398 why so many ways of doing it?. PLoS Biol 12(7): e1001899.
- 399 Barrett SC. 2013. The evolution of plant reproductive systems: how often are transitions  
400 irreversible? P Roy Soc B-Biol Sci 280(1765): 20130913.
- 401 Brandbyge J, KH Rechinger. 1989. A new *Rumex* from Ecuador. Nord J Bot 9(2): 203-204.
- 402 Burke JM, A Sanchez, KA Kron, MA Luckow. 2010. Placing the woody tropical genera of  
403 Polygonaceae: a hypothesis of character evolution and phylogeny. Am J Bot 97(8): 1377-  
404 1390.
- 405 Burke JM, A Sanchez. 2011. Revised subfamily classification for Polygonaceae, with a tribal  
406 classification for Eriogonoideae. Brittonia 63(4):510-520.
- 407 Campderá y Camin F. 1819. *Monographie des rumex, précédée de quelques vues générales sur*  
408 *la famille des polygonées*. Treuttel et Würtz, Paris.
- 409 Charlesworth B, D Charlesworth. 1978. A model for the evolution of dioecy and gynodioecy.  
410 Am Nat 112(988):975-997.
- 411 Charlesworth D. 2002. Plant sex determination and sex chromosomes. Heredity 88(2):94.
- 412 Crossman A, Charlesworth D. 2013. Breakdown of dioecy: Models where males acquire  
413 cosexual functions. Evolution 68(2):426-440.
- 414 Cunado N., R Navajas-Pérez, R de la Herrán, CR Rejón, MR Rejón, JL Santos, MA Garrido-  
415 Ramos. 2007. The evolution of sex chromosomes in the genus *Rumex* (Polygonaceae):  
416 identification of a new species with heteromorphic sex chromosomes. Chromosome Res  
417 15(7):825-833.

- 418 DarribaD., D Posada, AM. Kozlov, A Stamatakis, B Morel, T Flouri. 2020. ModelTest-NG: A  
419 new scalable tool for the selection of DNA and protein evolutionary models. *Mol. Biol*  
420 *and Evol.* 37(1): 291-294. <https://doi.org/10.1093/molbev/msz189>
- 421 Edgar RC. 2004. MUSCLE: multiple sequence alignment with high accuracy and high  
422 throughput. *Nucleic Acids Res* 32(5):1792-1797.
- 423 Fazekas AJ, KS Burgess, PR Kesanakurti, SW Graham, SG Newmaster, BC Husband, DM  
424 Percy, M Hajibabaei, SC Barrett. 2008. Multiple multilocus DNA barcodes from the  
425 plastid genome discriminate plant species equally well. *PLoS One* 3:e2802
- 426 Fox JF. 1985. Incidence of dioecy in relation to growth form, pollination and dispersal.  
427 *Oecologia* 67(2):244-249.
- 428 Grant KD. 2020 Phylogeny of docks and sorrels (*Rumex*: Polygonaceae) reveals plasticity of  
429 reproductive systems, Dryad, Dataset, <https://doi.org/10.5061/dryad.69p8cz8zs>.
- 430 Heilbuth JC. 2000. Lower species richness in dioecious clades. *Am Nat* 156(3):221-241.
- 431 Hough J, JD Hollister, W Wang, SC Barrett, SI Wright. 2014. Genetic degeneration of old and  
432 young Y chromosomes in the flowering plant *Rumex hastatulus*. *P Natl Acad Sci-Biol*  
433 111(21):7713-7718.
- 434 Koenemann DM, JM Burke. 2020. A Molecular Phylogeny for the Genus *Coccoloba*  
435 (Polygonaceae) with an Assessment of Biogeographic Patterns. *Syst Bot* 45(3): 567-575.
- 436 Lewis D. 1942. The evolution of sex in flowering plants. *Biol Rev* 17(1):46-67.
- 437 Lloyd DG. 1980. The distributions of gender in four angiosperm species illustrating two  
438 evolutionary pathways to dioecy. *Evolution* 34(1):123-134.
- 439 Löve Á. 1940. Polyploidy in *Rumex acetosella* L. *Nature* 145(3670):351.

- 440 Löve Á. 1942. Cytogenetic Studies In *Rumex*: III. Some Notes On The Scandinavian Species Of  
441 The Genus. *Hereditas* 28(3-4):289-296.
- 442 Löve Á. 1943. A Y-linked inheritance of asynapsis in *Rumex acetosa*. *Nature* 152(3856): 358.
- 443 Löve Á. 1944. Cytogenetic studies on *Rumex* subgenus *Acetosella*. *Hereditas* 30: 1-136.
- 444 Löve Á. 1957. Sex determination in *Rumex*. *Proc Genet Soc Can* 2: 31-36.
- 445 Löve Á, BM Kapoor. 1967. A chromosome atlas of the collective genus *Rumex*. *Cytologia*  
446 32:328-342.
- 447 Löve Á, D Löve. 1948. Chromosome numbers of northern plant species. Department of  
448 Agriculture, Reykjavik, University Institute of Applied Sciences.
- 449 Maddison WP. 2005. Mesquite: a modular system for evolutionary analysis. Version 1.06.  
450 <http://mesquiteproject.org>.
- 451 Mariotti B, R Navajas-Pérez, R Lozano, JS Parker, R De La Herrán, CR Rejón, MR Rejon, M  
452 Garrido-Ramos, M JAMILENA. 2006. Cloning and characterization of dispersed repetitive  
453 DNA derived from microdissected sex chromosomes of *Rumex acetosa*. *Genome*  
454 49(2):114-121.
- 455 Mariotti B, S Manzano, E Kejnovský, B Vyskot, M JAMILENA. 2009. Accumulation of Y-specific  
456 satellite DNAs during the evolution of *Rumex acetosa* sex chromosomes. *Mol Genet*  
457 *Genomics* 281(3):249.
- 458 Meisner, CF. 1856. De Candolle Prodrromus systematis naturalis regni vegetabilis. XIV. Paris.
- 459 Miller MA, W Pfeiffer, T Schwartz. 2010. Creating the CIPRES Science Gateway for inference  
460 of large phylogenetic trees. Pp. 1-8 in Proceedings of the Gateway Computing  
461 Environments Workshop (GCE). New Orleans, gateway Computing.

- 462 Ming R, A Bendahmane, SS Renner. 2011. Sex chromosomes in land plants. *Annu Rev Plant*  
463 *Biol* 62:485-514.
- 464 Mosyakin A. 2005. *Rumex*. In: Flora of North America Editorial Committee, eds. 1993+. Flora  
465 of North America North of Mexico. 16+ vols. New York and Oxford. Vol. 5.
- 466 Navajas-Pérez R, R de la Herrán, GL González, M Jamilena, R Lozano, CR Rejón, MR Rejón,  
467 MA Garrido-Ramos. 2005. The Evolution of Reproductive Systems and Sex-Determining  
468 Mechanisms Within *Rumex* (Polygonaceae) Inferred from Nuclear and Chloroplastial  
469 Sequence Data. *Mol Biol Evol* 22(9):1929-1939.
- 470 Rambaut A. 2014. FigTree version 1.4.3. University of Endinburgh, Endinburgh, U.K. Online at:  
471 [www.ac.uk/software/figtree](http://www.ac.uk/software/figtree) (accessed 30 November 2019).
- 472 Rechinger KH. 1933. Vorarbeiten zu einer Monographie der Gattung *Rumex*, III. Die Süd-und  
473 zentralamerikanischen Arten der Gattung *Rumex*. *Arkiv för botanik* 26A(3):1-58.
- 474 Rechinger KH. 1937. *The North American species of Rumex*. Chicago: Field Museum of Natural  
475 History.
- 476 Rechinger KH. 1939. Polygonaceae in *Illustrierte flora von Mittel - Europa*. edited by Gustav  
477 Hegi. Carl Hanser Verlag, Munich.
- 478 Rechinger KH. 1949. Rumices asiatici: Vorarbeiten zu einer Monographie der Gattung *Rumex*  
479 VII. *Candollea* 12: 9-162.
- 480 Rechinger KH. 1954a. Monograph of the genus *Rumex* in Africa: vorarbeiten zu einer  
481 Monographie der Gattung *Rumex* VIII. C.W.K. Gleerup, Lund.
- 482 Rechinger KH. 1954b. Beiträge zur kenntnis von *Rumex* XII: Some new American species of  
483 *Rumex*. *Leaflets of Western Botany* 7:133-135.

- 484 Rechinger KH. 1984. *Rumex* (Polygonaceae) in Australia: a reconsideration. *Nuytsia* 5(1):75-  
485 122.
- 486 Rechinger KH. 1990. *Rumex* subgen. *Rumex* sect. *Axillares* (Polygonaceae) in South America.  
487 *Plant Syst Evol* 172:151-192.
- 488 Renner SS, RE Ricklefs. 1995. Dioecy and its correlates in the flowering plants. *Am J Bot* 82(5):  
489 596–606.
- 490 Renner SS, H Won. 2001. Repeated evolution of dioecy from monoecy in *Siparunaceae*  
491 (Laurales). *Syst Biol* 50(5):700-712.
- 492 Renner SS. 2014. The relative and absolute frequencies of angiosperm sexual systems: dioecy,  
493 monoecy, gynodioecy, and an updated online database. *Am J Bot* 101(10):1588-1596.
- 494 Ronquist FM, P Teslenko, DL Van Der Mark , A Ayres, S Darling, B Hohna, L Larget, MA Liu,  
495 J Suchard, P Huelsenbeck. 2012. MrBayes 3.2: Efficient Bayesian phylogenetic inference  
496 and model choice across a large model space. *Syst Biol* 61:539–542.
- 497 Sanchez A, KA Kron. 2008. Phylogenetics of Polygonaceae with an Emphasis on the Evolution  
498 of *Eriogonoideae*. *Syst Bot* 33(1):87-96.
- 499 Sanchez A, TM Schuster, KA Kron. 2009. A Large Scale Phylogeny of Polygonaceae Based on  
500 Molecular Data. *Int J Plant Sci* 170(8):1044-1055.
- 501 Sanchez A, TM Schuster, JM Burke, KA Kron. 2011. Taxonomy of Polygonoideae  
502 (Polygonaceae): A new tribal classification. *Taxon* 60(1):151-160.
- 503 Schaefer H, SS Renner. 2011. Phylogenetic relationships in the order Cucurbitales and a new  
504 classification of the gourd family (*Cucurbitaceae*). *Taxon* 60(1): 122-138.
- 505 Schuster TM, JL Reveal, Kron KA. 2011. Phylogeny of Polygoneae (Polygonaceae:  
506 Polygonoideae). *Taxon* 60(6): 1653-1666.

- 507 Schuster TM, SD Setaro, KA Kron. 2013. Age estimates for the buckwheat family Polygonaceae  
508 based on sequence data calibrated by fossils and with a focus on the Amphi-Pacific  
509 Muehlenbeckia. PLoS One 8(4):e61261.
- 510 Schuster TM, JL Reveal, MJ Bayly, KA Kron. 2015. An updated molecular phylogeny of  
511 Polygonoideae (Polygonaceae): Relationships of *Oxygonum*, *Pteroxygonum*, and *Rumex*,  
512 and a new circumscription of *Koenigia*. Taxon 64(6):1188-1208.
- 513 Shibata F, M Hizume, Y Kuroki. 1999. Chromosome painting of Y chromosomes and isolation  
514 of a Y chromosome-specific repetitive sequence in the dioecious plant *Rumex acetosa*.  
515 Chromosoma 108(4):266-270.
- 516 Shibata F, M Hizume, Y Kuroki. 2000. Differentiation and the polymorphic nature of the Y  
517 chromosomes revealed by repetitive sequences in the dioecious plant, *Rumex acetosa*.  
518 Chromosome Res 8(3):229-236.
- 519 Świetlińska Z. 1963. Cytogenetic relationships among *Rumex acetosa*, *Rumex arifolius* and  
520 *Rumex thyrsiflorus*. Acta Soc Bot Pol 32(2):215-279.
- 521 Thiers B. 2019. Updated continuously. Index Herbariorum-The William & Lynda Steere  
522 Herbarium, The New York Botanical Garden Retrieved from  
523 <http://sweetgum.nybg.org/science/ih/>
- 524 Wagner WL, SH Sohmer SH, DR Herbst DR. 1999. Manual of the flowering plants of Hawai'i.  
525 Honolulu: Univ. of Hawaii Press.
- 526 Zwickl, D.J. 2006. Genetic algorithm approaches for the phylogenetic analysis of large  
527 biological sequence datasets under the maximum likelihood criterion. Ph.D. Dissertation.  
528 Austin, Texas: The University of Texas at Austin.
- 529



530 **Appendix 1:** List of taxa sampled, GenBank Accession Numbers, and Sequence Vouchers

531 Parenthetical values following the voucher are institutional barcodes or accession numbers when

532 available. Chloroplast region order is *rbcLa*, *trnH-psbA*, and *3trnL-F* unless otherwise indicated.

533 For sequences that we did not generate, accession information is given as found on GenBank.

534 **GenBank Sequences Used for this Study**

535 *rbcL*: *Rumex pamiricus* Rech. f. - JF944139.1, *Rumex sibiricus* Hulten- KC483892.1

536 *trnH-psbA*: *Rumex pamiricus*- JN047053.1

537

538 **DNA Sequences Generated for this Study**

| Scientific Name                                 | Voucher                   | Extraction # | trnH-psbA | rbcL | trnL-F |
|-------------------------------------------------|---------------------------|--------------|-----------|------|--------|
| <i>Emex australis</i> Steinh.                   | P.C. Zietsma 4053, NY     | 180          |           |      |        |
| <i>Emex spinosa</i> (L.) Campd.                 | Schuhwerk 90/328, NY      | 183          |           |      |        |
| <i>Emex spinosa</i> (L.) Campd.                 | J.M. Burke 302, HUDC      | 371          |           |      |        |
| <i>Persicaria virginiana</i> (L.) Gaertn.       | J.M. Burke s.n., BH       | 106          |           |      |        |
| <i>Rheum alexandrae</i> Batalin                 | Cultivated Material, HUDC | 204          |           |      |        |
| <i>Rheum emodii</i> Wall.                       | Cultivated Material, HUDC | 205          |           |      |        |
| <i>Rheum officinale</i> Baill.                  | Cultivated Material, HUDC | 207          |           |      |        |
| <i>Rheum palmatum</i> var. <i>taguticaum</i> L. | Cultivated Material, HUDC | 208          |           |      |        |
| <i>Rheum rhabarbarum</i> L.                     | Cultivated Material, HUDC | 206          |           |      |        |
| <i>Rheum nobile</i> Hook. f. & Thomson          | Pradham 820581, BH        | 104          |           |      |        |
| <i>Rumex abyssinicus</i> Jacq.                  | Burke 251, HUDC           | 137          |           |      |        |
| <i>Rumex acetosa</i> L.                         | Grant s.n., HUDC          | 219          |           |      |        |
| <i>Rumex acetosella</i> L.                      | R. Brand 1336, NY         | 187          |           |      |        |
| <i>Rumex acetosella</i> L.                      | Atha 10521, NY            | 199          |           |      |        |
| <i>Rumex acetosella</i> L.                      | Grant s.n., HUDC          | 209          |           |      |        |

|                                                |                       |     |
|------------------------------------------------|-----------------------|-----|
| <i>Rumex acetosella</i> L.                     | J.M. Burke 309, HUDC  | 383 |
| <i>Rumex albescens</i> Hillebr.                | Lorence 5224, K       | 141 |
| <i>Rumex albescens</i> Hillebr.                | Wood 14959, US        | 216 |
| <i>Rumex alpinus</i> L.                        | Larsen 20708, US      | 164 |
| <i>Rumex alpinus</i> L.                        | D. E. Atha 5114, NY   | 193 |
| <i>Rumex altissimus</i> Alph, Wood             | Shultz 8717, US       | 173 |
| <i>Rumex altissimus</i> Alph. Wood             | D. E. Atha 10857, NY  | 198 |
| <i>Rumex alveolatus</i> Los.-Losinsk.          | Rechinger 48318, US   | 159 |
| <i>Rumex amurensis</i> F. Schmidt ex<br>Maxim. | Barrett Lilan22p      | 227 |
| <i>Rumex aquaticus</i> L.                      | Elias 7251, US        | 220 |
| <i>Rumex arcticus</i> Trautv.                  | Shetler 4560, US      | 221 |
| <i>Rumex arifolius</i> All.                    | K. Deguchi 4023, NY   | 189 |
| <i>Rumex bequaertii</i> De Wild.               | Germishuizen 3447, US | 222 |
| <i>Rumex berlandieri</i> Meisn.                | Thieret 17178, US     | 155 |
| <i>Rumex brachypodus</i> Rech. f.              | J.M. Burke 312, HUDC  | 377 |
| <i>Rumex brasiliensis</i> Link                 | R. Wasum 1655, NY     | 190 |
| <i>Rumex brownii</i> Campd.                    | Wilson 10250, NY      | 191 |
| <i>Rumex brownii</i> Campd.                    | Wilson 10250, US      | 223 |
| <i>Rumex bucephalophorus</i> L.                | Barrett 17RBTA5       | 229 |
| <i>Rumex bucephalophorus</i> L.                | J.M. Burke 293, HUDC  | 363 |
| <i>Rumex bucephalophorus</i> L.                | J.M. Burke 301, HUDC  | 370 |
| <i>Rumex bucephalophorus</i> L.                | J.M. Burke 304, HUDC  | 372 |
| <i>Rumex chrysocarpus</i> Moris                | D. E. Atha 13012, NY  | 196 |
| <i>Rumex conglomeratus</i> Murray              | D. E. Atha 10045, NY  | 202 |
| <i>Rumex conglomeratus</i> Murray              | J.M. Burke 271, HUDC  | 212 |
| <i>Rumex conglomeratus</i> Murray              | J.M. Burke 298, HUDC  | 367 |

|                                               |                           |     |
|-----------------------------------------------|---------------------------|-----|
| <i>Rumex conglomeratus</i> Murray             | J.M. Burke 299, HUDC      | 368 |
| <i>Rumex crispus</i> L.                       | J.M. Burke 268, HUDC      | 213 |
| <i>Rumex cuneifolius</i> Campd.               | J.C. Solomon 13044, US    | 224 |
| <i>Rumex cyprius</i> Murb.                    | Kocher B-273, US          | 167 |
| <i>Rumex densiflorus</i> Osterh.              | Pinkava P12626, US        | 160 |
| <i>Rumex dentatus</i> L.                      | D.G. Kelch 07.328, OSC    | 406 |
| <i>Rumex giganteus</i> Aiton                  | K. Thorne 6736, NY        | 184 |
| <i>Rumex giganteus</i> Aiton                  | Canfield 1304, US         | 217 |
| <i>Rumex graminifolius</i> Gerogi ex<br>Lamb. | Petrosky 1811, US         | 175 |
| <i>Rumex hastatulus</i> Baldwin               | D. E. Atha 10503, NY      | 203 |
| <i>Rumex hastatus</i> D. Don                  | MacArthur 1291, US        | 172 |
| <i>Rumex hastatus</i> D. Don                  | Barrett s.n.              | 230 |
| <i>Rumex hymenosepalus</i> Torr.              | Cultivated material, HUDC | 210 |
| <i>Rumex hymenosepalus</i> Torr.              | A. Tiehm 15727, OSC       | 407 |
| <i>Rumex induratus</i> Bioss. et Reut.        | M.W. Chase 925, K         | 140 |
| <i>Rumex induratus</i> Bioss. et Reut.        | Barrett s.n.              | 231 |
| <i>Rumex induratus</i> Bioss. et Reut.        | J.M. Burke 310, HUDC      | 375 |
| <i>Rumex intermedius</i> DC.                  | Rainha 5270, US           | 169 |
| <i>Rumex japonicus</i> Houtt.                 | Bai-Zhang 4049, US        | 225 |
| <i>Rumex kernerii</i> Borbás                  | Barta 2004-390, US        | 168 |
| <i>Rumex lanceolatus</i> Thunb.               | H.J. Venter 10295, NY     | 177 |
| <i>Rumex longifolius</i> DC.                  | D. E. Atha 8858, NY       | 195 |
| <i>Rumex lunaria</i> L.                       | NR. 8879, NY              | 178 |
| <i>Rumex lunaria</i> L.                       | Barrett 17RLLM1           | 232 |
| <i>Rumex lunaria</i> L.                       | Barrett 17RLTF1           | 233 |
| <i>Rumex maritimus</i> L.                     | Shiu Ying Hu 13127, US    | 154 |

|                                                    |                                  |     |
|----------------------------------------------------|----------------------------------|-----|
| <i>Rumex mexicanus</i> Meisn.                      | D.E. Breedlove 13305, US         | 226 |
| <i>Rumex microcarpus</i> Campd.                    | Barrett MJ-P40 (Seed)            | 234 |
| <i>Rumex nepalensis</i> Spreng.                    | J.M. Burke 248, HUDC             | 135 |
| <i>Rumex nervosus</i> Vahl                         | J.M. Burke 252, HUDC             | 139 |
| <i>Rumex obtusifolius</i> L.                       | J.M. Burke s.n., BH              | 93  |
| <i>Rumex obtusifolius</i> L.                       | J.M. Burke 270, HUDC             | 214 |
| <i>Rumex orbiculatus</i> A. Gray                   | Ruee 43716, US                   | 163 |
| <i>Rumex orbiculatus</i> A. Gray                   | D.E. Atha et al 8883/2010,<br>NY | 211 |
| <i>Rumex pallidus</i> Bigelow                      | D.E. Atha 13922, NY              | 192 |
| <i>Rumex palustris</i> Sm.                         | J.M. Burke 306, HUDC             | 374 |
| <i>Rumex papilio</i> Coss. & Balansa,              | S.L. Jury 13659, K               | 144 |
| <i>Rumex papilio</i> Coss. & Balansa               | J.M. Burke 303, HUDc             | 380 |
| <i>Rumex patientia</i> L.                          | D. E. Atha 10674, NY             | 197 |
| <i>Rumex paucifolius</i> Nutt.                     | Barrett 17RpCOT3.2               | 235 |
| <i>Rumex paucifolius</i> Nutt.                     | Barrett 17RpCMC15.2              | 236 |
| <i>Rumex peruanus</i> Rech. f.                     | V. Quipuscoa 1349, NY            | 185 |
| <i>Rumex pictus</i> Forssk.                        | Barrett 17Rp.AR1                 | 237 |
| <i>Rumex pulcher</i> L.                            | J.M. Burke 294, HUDC             | 364 |
| <i>Rumex pulcher</i> L.                            | J.M. Burke 295, HUDC             | 365 |
| <i>Rumex pulcher</i> L.                            | J.M. Burke 296, HUDC             | 366 |
| <i>Rumex rothschildianus</i> Aarons. ex<br>Evenari | Barrett 17Rrs3.2                 | 238 |
| <i>Rumex sagittatus</i> Thunb.                     | Strobach B55575, US              | 166 |
| <i>Rumex sagittatus</i> Thunb.                     | H.J. Venter 9995, NY             | 181 |
| <i>Rumex salicifolius</i> Weinm.                   | W. Wood s.n., OSC                | 410 |
| <i>Rumex sanguineus</i> L.                         | J.M. Burke s.n., HUDC            | 215 |

|                                           |                          |     |
|-------------------------------------------|--------------------------|-----|
| <i>Rumex scutatus</i> L.                  | Barrett s.n.             | 239 |
| <i>Rumex skottsbergii</i> O.Deg. & I.Deg. | Degener 35050, US        | 218 |
| <i>Rumex spiralis</i> Small.              | D. E. Atha 9727, NY      | 200 |
| <i>Rumex stenophyllus</i> Ledeb.          | D. E. Atha 11389, NY     | 201 |
| <i>Rumex stenophyllus</i> Ledeb.          | R.L. McGregor 40643, OSC | 411 |
| <i>Rumex tianschanicus</i> Losinsk.       | Barrett SH1-A-2007454    | 240 |
| <i>Rumex thyrsoiflorus</i> Fingerh.       | Ollegard 261, US         | 153 |
| <i>Rumex thyrsoiflorus</i> Fingerh.       | Elias 7282, US           | 165 |
| <i>Rumex thyrsoides</i> Desf.             | J.M. Burke 305, HUDC     | 373 |
| <i>Rumex thyrsoides</i> Desf.             | J.M. Burke 313, HUDC     | 378 |
| <i>Rumex thyrsoides</i> Desf.             | J.M. Burke 307, HUDC     | 381 |
| <i>Rumex tuberosus</i> L.                 | S. Omar et al 52591, K   | 147 |
| <i>Rumex tuberosus</i> subsp. <i>nov</i>  | J.M. Burke 308, HUDC     | 382 |
| <i>Rumex usambarensis</i> (Dammer)        |                          |     |
| Dammer                                    | Ellemann 889, NY         | 186 |
| <i>Rumex venosus</i> Pursh.               | R.E. Brainerd 428, OSC   | 413 |
| <i>Rumex vesicarius</i> L.                | Brummit 15271, US        | 152 |

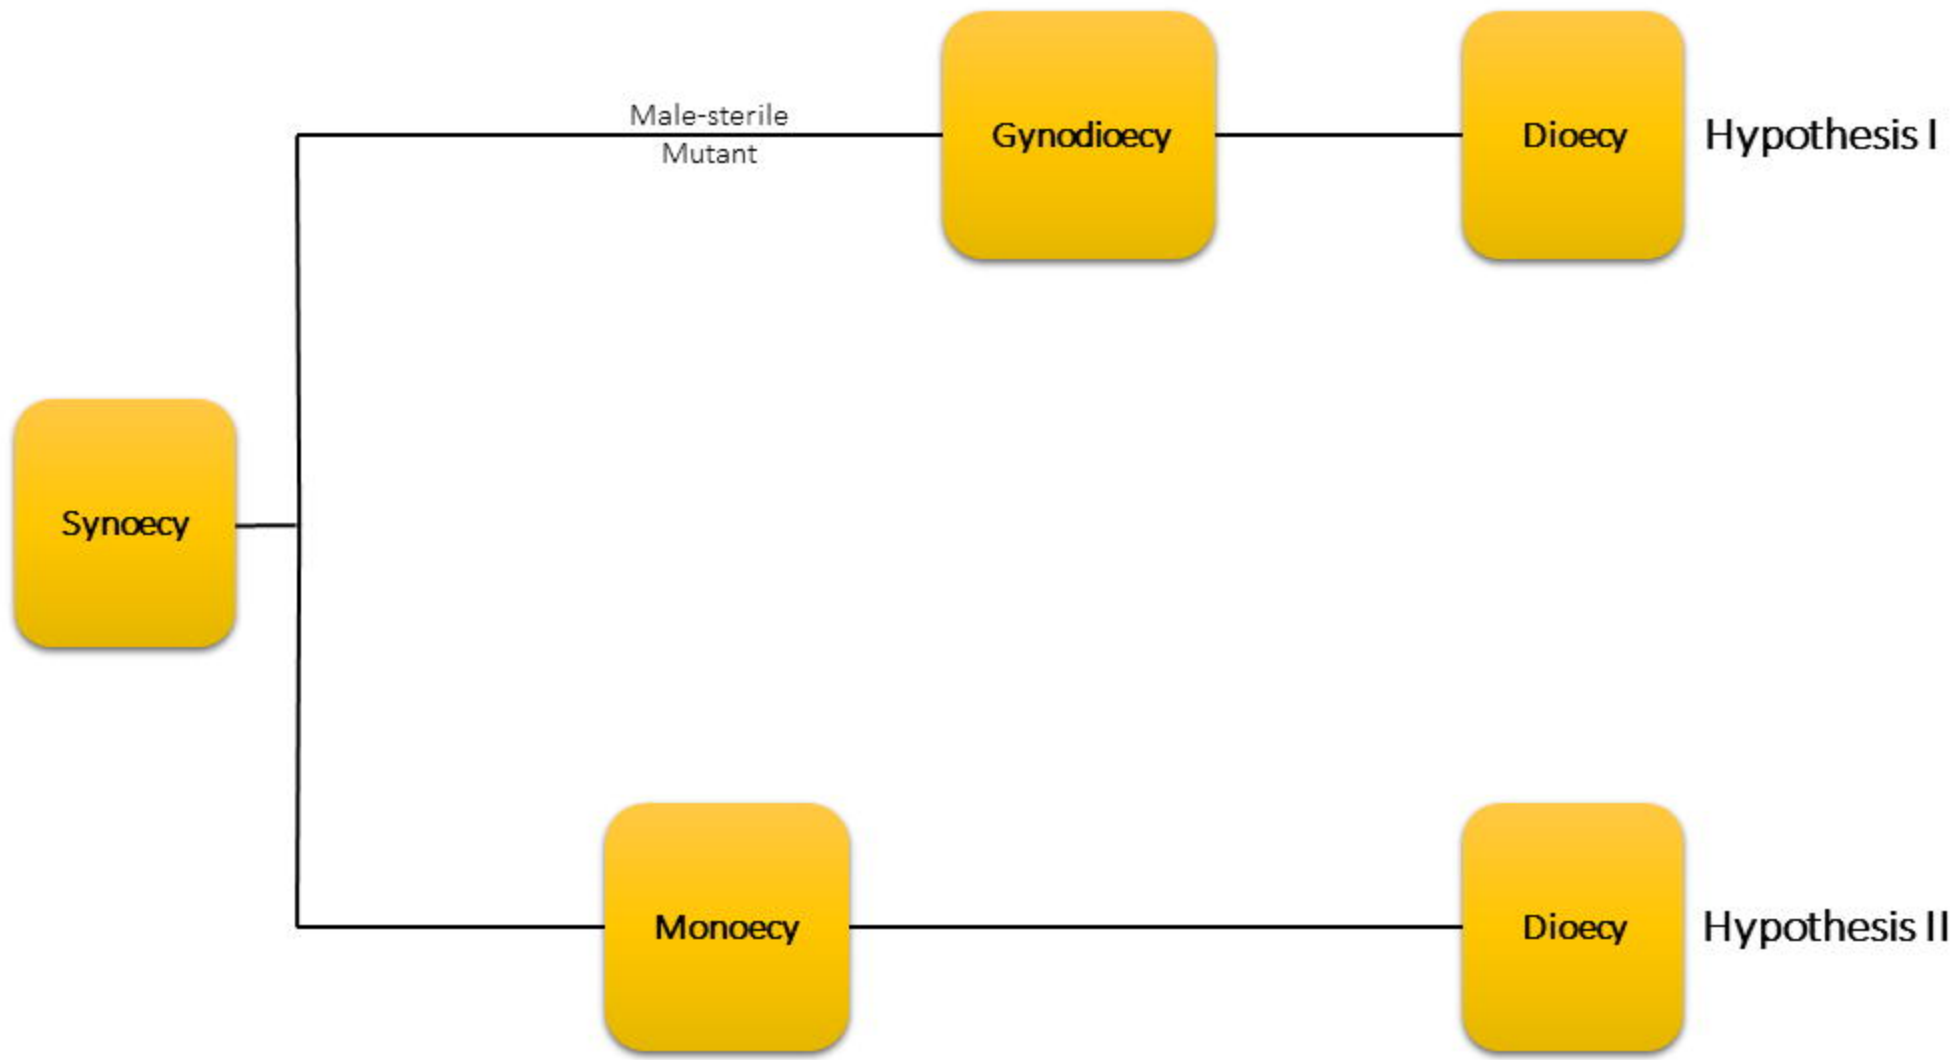

Source: https://www.biorxiv.org/content/biorxiv/early/2020/09/12/2020.09.11.293118.full.pdf
